# Supplementary material for: Preclinical Evaluation of Sequential Combination of Oncolytic Adenovirus Delta-24-RGD and Phosphatidylserine-Targeting Antibody in Pancreatic Ductal Adenocarcinoma
Source: Oxford University Press journal article supplement (doi:10.1158/1535-7163.mct-16-0526), 2017-01-30
Supplement: 15357163mct160526-sup-168472_1_supp_3744246_ygp40l.docx [file 15357163mct160526-sup-168472_1_supp_3744246_ygp40l.docx]

| **Cell Lines** | **IC50 (MOI)** |
| --- | --- |
| MDA-PATC53 | 0.03 |
| MiaPaCa2 | 0.04 |
| PANC1 | 0.17 |
| MDA-PATC108 | 0.29 |
| ASPC1 | 1.15 |
| Hu251 | 1.25 |
| MDA-PATC118 | 1.35 |
| MDA-PATC50 | 8.98 |
| MDA-PATC66 | 78.3 |
| BxPC3 | 89.2 |
| HPNE-tert | 100 |
| HS766T | 100 |
| MDA-PATC43 | 100 |

Supplementary table 1

Summary of IC50 of Ad-24-RGD in cell lines
